# Supplementary material for: An Improved HRPE-Based Transcriptional Output Reporter to Detect Hypoxia and Anoxia in Plant Tissue
Source: MDPI journal article supplement (doi:10.3390/bios10120197), 2020-12-03
Supplement: s1 [file s1]

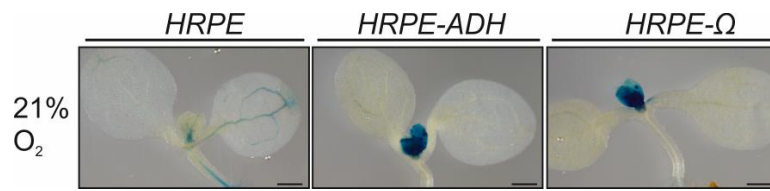

**Supplementary Figure 1.** Overnight histochemical GUS staining of *HRPE:GG* variants grown at 21% O<sub>2</sub>. Scale bar: 1 mm.
