# Supplementary material for: An Improved HRPE-Based Transcriptional Output Reporter to Detect Hypoxia and Anoxia in Plant Tissue
Source: MDPI journal article supplement (doi:10.3390/bios10120197), 2020-12-03
Supplement: s1 [file s1]

**Supplementary table 1.** HRPE promoters sequences used and generated in this study.

| Name     | Sequence                                                                                                                                                                                                                                                                                                                                                                                                                                                                                                                                                                               |
|----------|----------------------------------------------------------------------------------------------------------------------------------------------------------------------------------------------------------------------------------------------------------------------------------------------------------------------------------------------------------------------------------------------------------------------------------------------------------------------------------------------------------------------------------------------------------------------------------------|
| HRPE     | TGAATCAGGGTGAAGAAAAACAGCGGCGGTTCTTGAATCAGGGTGAAGAAAAACA<br>GCGGCGGTTCTTGAATCAGGGTGAAGAAAAACAGCGGCGGTTCTTGAATCAGGGTG<br>AAGAAAAACAGCGGCGGTTCTTGAATCAGGGTGAAGAAAAACAGCGGCGGTTCTCG<br>CAAGACCCTTCCTCTATATAAGGAAGTTCATTTCAATTTGGAGAGGTATTTTTACAACA<br>ATTACCAACAACAACAAACAACAAGT                                                                                                                                                                                                                                                                                                           |
| HRPE-Ω   | TGAATCAGGGTGAAGAAAAACAGCGGCGGTTCTTGAATCAGGGTGAAGAAAAACA<br>GCGGCGGTTCTTGAATCAGGGTGAAGAAAAACAGCGGCGGTTCTTGAATCAGGGTG<br>AAGAAAAACAGCGGCGGTTCTTGAATCAGGGTGAAGAAAAACAGCGGCGGTTCTCG<br>CAAGACCCTTCCTCTATATAAGGAAGTTCATTTCAATTTGGAGAGGTATTTTTACAACA<br>ATTACCAACAACAACAAACAACA <b>CTCCGGTATTTTTACAACAATACCACAACAAA</b><br><b>ACAAACAACAAACAACATTACAATTTACTATTCTAGTCTGA</b>                                                                                                                                                                                                                  |
| HRPE-ADH | TGAATCAGGGTGAAGAAAAACAGCGGCGGTTCTTGAATCAGGGTGAAGAAAAACA<br>GCGGCGGTTCTTGAATCAGGGTGAAGAAAAACAGCGGCGGTTCTTGAATCAGGGTG<br>AAGAAAAACAGCGGCGGTTCTTGAATCAGGGTGAAGAAAAACAGCGGCGGTTCTCG<br>CAAGACCCTTCCTCTATATAAGGAAGTTCATTTCAATTTGGAGAGGTATTTTTACAACA<br>ATTACCAACAACAACAAACAACA <b>ACGCCAAGTGGAAGAGCGTTCGAGAGAACA</b><br><b>AGGCAAAACCAAATACGCCCTAGTATTCTACAGATGTCGACTGGATAATTACAA</b><br><b>AAGATTTCAATAAACAGTACTAATTAATTTCTAGTGGTGAGTTTTGTAAATATCT</b><br><b>ACTTCTTCCAATTACCAGCTGCTATATAAATCCCTTCTCTGTTTCTCTTTTCTTAC</b><br><b>ATCACAATCACACAAAACAAACAAAGATCAAAAGCAAGTTCTTCACTGTTGATA</b> |

**Supplementary table 2.** List of nucleotide sequences generated in this study

| Name    | Sequence                                                                                                                                                                                                                                                                                                                                                                                                                                                          |
|---------|-------------------------------------------------------------------------------------------------------------------------------------------------------------------------------------------------------------------------------------------------------------------------------------------------------------------------------------------------------------------------------------------------------------------------------------------------------------------|
| UnaG    | CACCATGGTCGAGAAGTTCGTTGGAACCTGGAAGATCGCTGACAGCCATAACTTCG<br>GAGAGTACCTCAAGGCTATCGGGGCTCCTAAAGAACTCTCTGATGGTGGTGATGCTA<br>CTACCCCGACTCTCTACATCTCTCAAAGGACGGTGACAAGATGACCGTGAAGATCG<br>AAAACGGACCTCCTACCTTCCTCGATACCCAGGTAAAGTTCAAGCTCGGGGAAGAGT<br>TCGATGAGTTCCCATCTGATAGACGTAAGGGCGTGAAGTCTGTGGTTAACCTCGTTG<br>GAGAGAAGCTCGTGACGTTCAAAGTGGGACGGGAAAGAGACTACCTACGTCAGA<br>GAGATCAAGGACGGAAAGCTCGTGGTGACTCTCACTATGGGAGATGTTGTGGCTGTG<br>AGGTCTTACAGACGTGCTACTGAATGA |
| iLov    | CACCATGATCGAGAAGAACTTCGTGATTACCGATCCTAGGCTCCCTGACAACCCTAT<br>CATCTTCGCTTCAGATGGCTTCCTCGAGCTGACCGAATACTCTAGAGAAGAGATCCT<br>CGGTAGGAACGCTAGATTCTTCAAGGACCTGAGACTGATCAGGCCACCGTGCAAA<br>AGATCAGAGATGCTATCAGGGACCAGCGTGAGACTACTGTTCACTCATCACTACA<br>CCAAGAGCGGCAAGAGATTCTGGAACCTTCTTCATCTCCAGCCTGTGAGGGATCAGA<br>AGGGTGAGCTTCAATACTTCATCGGAGTGCAGCTCGATGGATCTGATCACGTTTGA                                                                                             |
| Pp2FbFP | CACCATGATCAACGCTAAGCTCCTCCAGCTCATGGTCGAGCATTTCAACGATGGAAT<br>CGTGGTGGCTGAGCAAGAGGGAAACGAGAGCATCATGATCTACGTGAACCCTGCTT<br>TCGAGAGGCTCACTGGATACTGCGCTGATGATATCCTCTACCAGGATGCTAGATTCTT                                                                                                                                                                                                                                                                               |

|  |                                                                                                                                                                                                                                                                                                          |
|--|----------------------------------------------------------------------------------------------------------------------------------------------------------------------------------------------------------------------------------------------------------------------------------------------------------|
|  | CCAAGGTGAGGATCACGATCAACCGGGAATCGCTATTATCCGTGAGGCTATCAGAG<br>AGGGTAGACCTTGTTGTCAGGTGCTCCGTAACCTACCGTAAGGACGGATCTTGTTCTG<br>GAACGAGCTTAGCATCACCCCTGTGCATAACGAGGCTGATCAGTTGACCTACTACAT<br>CGGGATCCAGAGAGATGTGACTGCTCAGGTTTTCGCTGAAGAGAGGGTTAGAGAGC<br>TTGAGGCTGAAGTTGCTGAGCTTAGAAGGCAACAGGGACAAGCTAAGCACTGA |
|--|----------------------------------------------------------------------------------------------------------------------------------------------------------------------------------------------------------------------------------------------------------------------------------------------------------|
